# Supplementary material for: Novel β-Cyclodextrin and Catnip Essential Oil Inclusion Complex and Its Tick Repellent Properties
Source: MDPI journal article supplement (doi:10.3390/molecules26237391), 2021-12-06

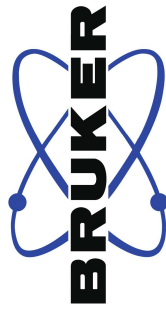

Current Data Parameters  
NAME JH\_20210924-CATNIP  
EXPNO 1  
PROCNO 1

F2 - Acquisition Parameters  
Date\_ 20210924  
Time 15.08  
INSTRUM AV300  
PROBHD 5 mm PABBO BB-  
PULPROG zg30  
TD 16384  
SOLVENT D2O  
NS 16  
DS 0  
SWH 4496.403 Hz  
FIDRES 0.274439 Hz  
AQ 1.8219008 sec  
RG 574.7  
DW 111.200 usec  
DE 6.50 usec  
TE 296.5 K  
D1 1.00000000 sec  
TD0 1

===== CHANNEL f1 =====  
NUC1 1H  
P1 9.07 usec  
PL1 8.00 dB  
SFO1 300.1318534 MHz

F2 - Processing parameters  
SI 32768  
SF 300.1299729 MHz  
WDW EM  
SSB 0  
LB 0.30 Hz  
GB 0  
PC 1.00

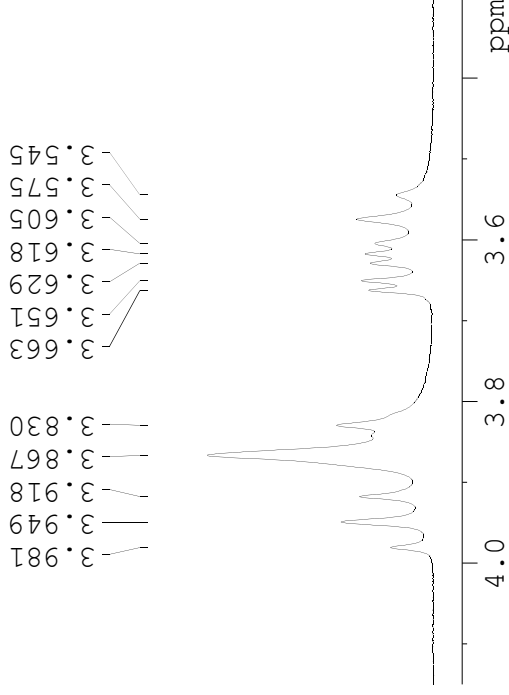

6.5 6.0 5.5 5.0 4.5 4.0 3.5 3.0 2.5 2.0 1.5 1.0 0.5 ppm

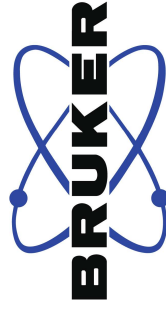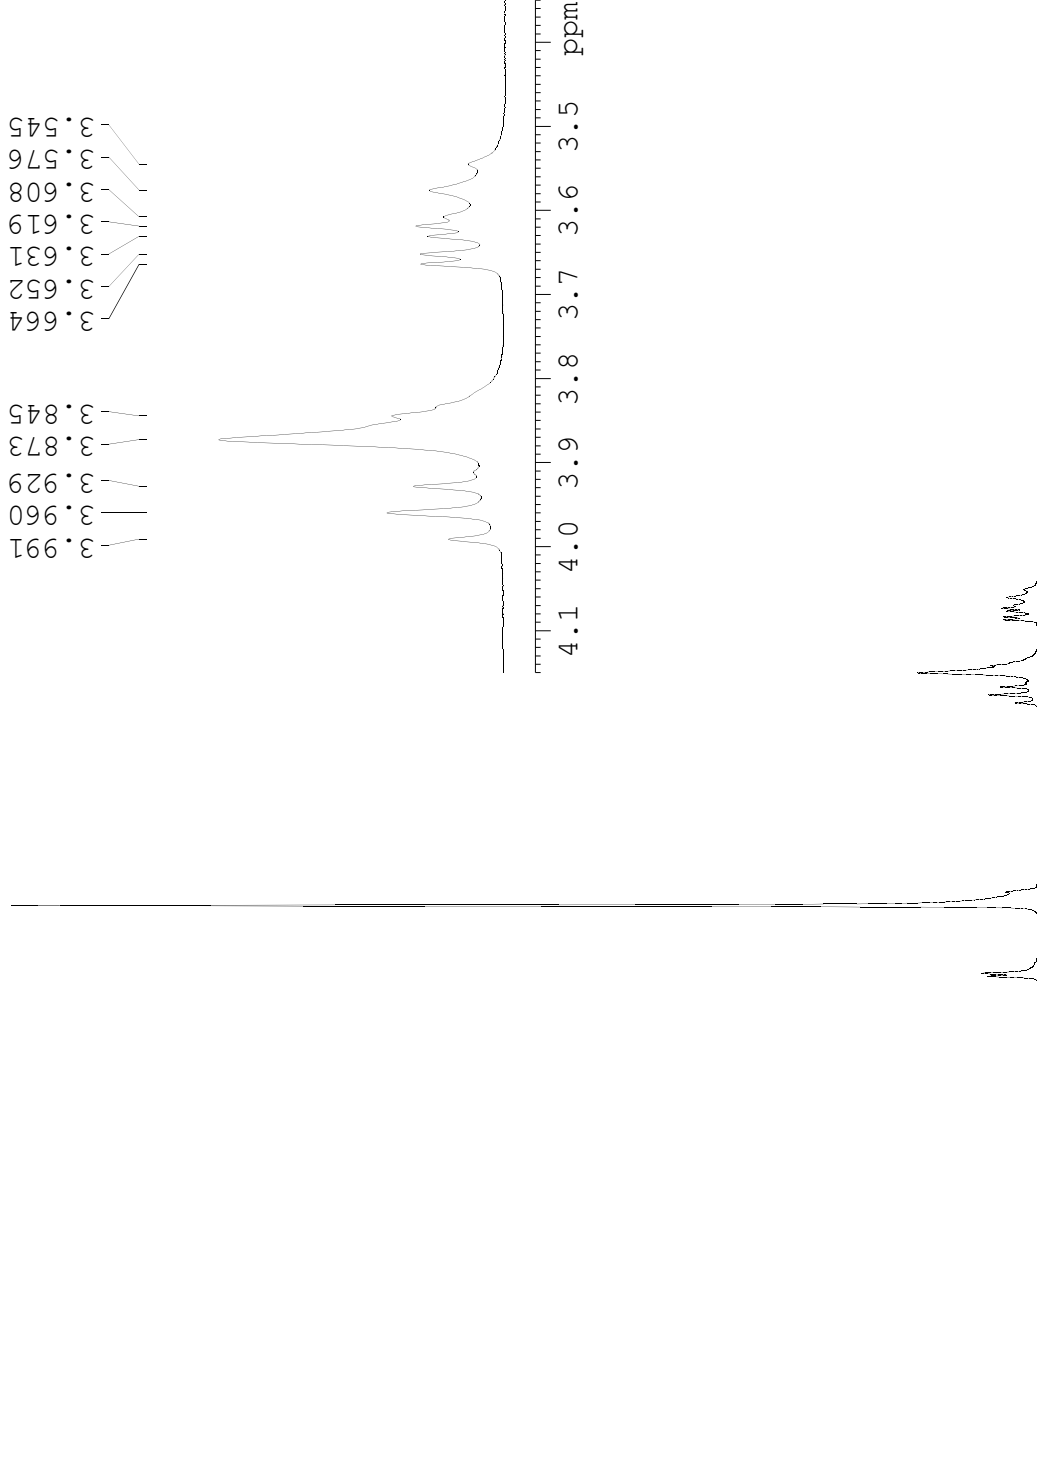

Current Data Parameters  
NAME JH\_20210924-B-CD  
EXPNO 1  
PROCNO 1

F2 - Acquisition Parameters  
Date\_ 20210924  
Time 14.56  
INSTRUM AV300  
PROBHD 5 mm PABBO BB-  
PULPROG zg30  
TD 16384  
SOLVENT D2O  
NS 8  
DS 0  
SWH 4496.403 Hz  
FIDRES 0.274439 Hz  
AQ 1.8219008 sec  
RG 362  
DW 111.200 usec  
DE 6.50 usec  
TE 296.5 K  
D1 1.00000000 sec  
TD0 1

===== CHANNEL f1 =====  
NUC1 1H  
P1 9.07 usec  
PL1 8.00 dB  
SF01 300.1318534 MHz

F2 - Processing parameters  
SI 32768  
SF 300.1299728 MHz  
WDW EM  
SSB 0  
LB 0.30 Hz  
GB 0  
PC 1.00

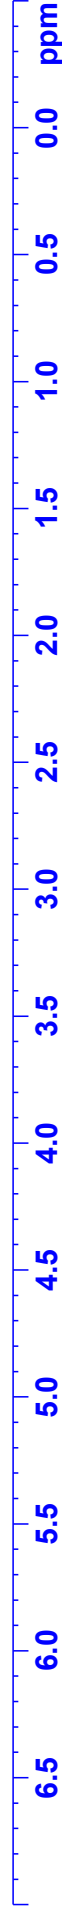

Supplement: s1 [file s1]
